# Supplementary material for: The Mutation of piezo1 Weakens the Intermuscular Bones in Zebrafish and Crucian Carp
Source: MDPI journal article supplement (doi:10.3390/ijms262210851), 2025-11-08
Supplement: s1 [file ijms-3967246-supplementary.pdf › ijms-3967246-supplementary.pdf]

# The mutation of *piezo1* weakens the intermuscular bones in zebrafish and crucian carp

Xinyu Zhang <sup>1,2,†</sup>, Jinyuan Che <sup>1,2,†</sup>, Zhuang Li <sup>1,2</sup>, Baolong Bao <sup>1,2,3,\*</sup> and Chunxin Fan <sup>1,2,3,\*</sup>

<sup>1</sup> Key Laboratory of Exploration and Utilization of Aquatic Genetic Resources, Ministry of Education, Shanghai Ocean University, Shanghai 201306, China

<sup>2</sup> International Research Center for Marine Biosciences, Ministry of Science and Technology, Shanghai Ocean University, Shanghai 201306, China

<sup>3</sup> National Demonstration Center for Experimental Fisheries Science Education, Shanghai Ocean University, Shanghai, 201306, China.

\* Corresponding author: cxfan@shou.edu.cn (C.F.); blbao@shou.edu.cn (B.B.) .

† These authors contributed equally to this work.

## Supplementary Table S1

Primers used in this study for sgRNA template assembly, probe template assembly, genotyping and qPCR.

| Name                | Sequence (5' - 3' )                           | Application        |
|---------------------|-----------------------------------------------|--------------------|
| Universal           | AAAAGCACCGACTCGGTGCCACTTTTTCAAGTTGATAACGGACT  | sgRNA Template     |
| Bottom              | AGCCTTATTTTAACTTGCTATTTCTAGCTCTAAAAC          | Assembly           |
| M13-FAM             | CAGGGTTTTCCCAGTCACG                           | Genotyping         |
| <b>Zebrafish</b>    |                                               |                    |
| Scxa                | F: GAGATCCGTCAACGCAATGC                       | Probe Template     |
|                     | R: GGACACACTGGTGATGCTGA                       | Assembly           |
| piezo1              | F: AGTTGGCAGACATGGGACTG                       | Probe Template     |
|                     | R: CTGGGTATCACCTCGTCAGC                       | Assembly           |
| piezo1              | TAATACGACTCACTATAGCTGCTTGCAGTACGTGTGTTTTAGAGC | sgRNA Template     |
|                     | TAGAA                                         | Assembly           |
| piezo2b             | TAATACGACTCACTATACGTTCTCGATGGGCACGGGTTTTAGAGC | sgRNA Template     |
|                     | TAGAA                                         | Assembly           |
| piezo1              | F: TGTAAAACGACGGCCAGTGGATGCTGAGGACACGTCAA     | Genotyping         |
|                     | R: GTGTCTTCTCACCAGGGCACCCAAG                  |                    |
| piezo2b             | F: TGTAAAACGACGGCCAGTTGCCATAATTCCCGTTTGTG     | Genotyping         |
|                     | R: GTGTCTTAGGCATTGAGACTTCGCGG                 |                    |
| eef1a11l            | F: ACCTACCCTCCTCTTGGTCG                       | Reference for qPCR |
|                     | R: GGAACGGTGTGATTGAGGGAA                      |                    |
| piezo1              | F: GAGAGGATGCGGCTTCTCAA                       | qPCR               |
|                     | R: CCACATGGTGAATCCGTCCA                       |                    |
| piezo2b             | F: ACCAGCCAGTTTGAGGATGG                       | qPCR               |
|                     | R: ACCACTGACTTTAGCATAGCTGTA                   |                    |
| <b>Crucian Carp</b> |                                               |                    |
| piezo1a-T1          | TAATACGACTCACTATAGGCATTATCAAGGCTGGGGAGTTTTAG  | sgRNA Template     |
|                     | AGCTAGAA                                      | Assembly           |
| piezo1a-T2          | TAATACGACTCACTATAGGTGTGCCGTGGCACGCAGGGTTTTAG  | sgRNA Template     |
|                     | AGCTAGAA                                      | Assembly           |
| piezo1a-T3          | TAATACGACTCACTATAGGGTGAGGCTGGAGAGGAAGGTTTTAG  | sgRNA Template     |
|                     | AGCTAGAA                                      | Assembly           |
| piezo1a-T1          | F: TGTAAAACGACGGCCAGTCTCCATTCCACAGGACACAC     | Genotyping         |
|                     | R: GTGTCTTGCCGTGGACCACTACTAACC                |                    |
| piezo1a-T2          | F: TGTAAAACGACGGCCAGTTGTAGAAGGAGAAGATGAGGGAA  | Genotyping         |
|                     | R: GTGTCTTGTCCTCAACTATTATGCTAAGCCTG           |                    |
| piezo1a-T3          | F: TGTAAAACGACGGCCAGTACAGCTCTGTCTCCTTGAAC     | Genotyping         |
|                     | R: GTGTCTTCAAATTGGGGGCTTTGTCCA                |                    |

**A**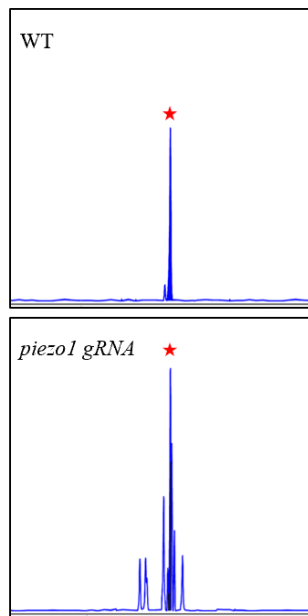**B**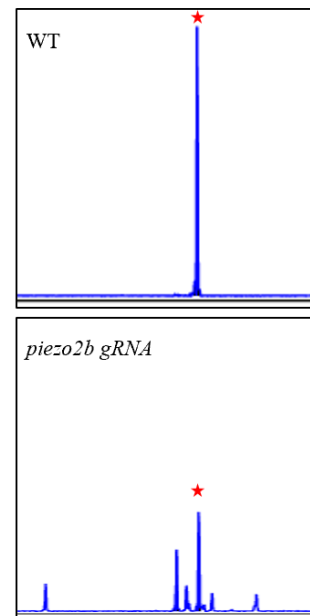

**Supplementary Figure S1.** Analysis of *piezo1* (A) and *piezo2b* (B) targeting efficiency by fluorescent PCR-coupled capillary electrophoresis. The x-axes (size) and y-axes (signal intensity) of the peak diagrams for WT and mutant fish are aligned. Red stars indicate the position of the WT peak.
